# Supplementary material for: Effectiveness of mobile computerized cognitive training in adults with mild cognitive impairment: interim analysis of a randomized controlled trial
Source: Research Square preprint supplement (doi:10.21203/rs.3.rs-3099721/v1), 2024-03-22
Supplement: Supplementary file 1 [file 2adeebda92de2d25f9e6f584.docx]

# CONSORT CHECKLIST

Based on the CONSORT guidelines.

Citations:

Schulz KF, Altman DG, Moher D, for the CONSORT Group. CONSORT 2010 Statement: updated guidelines for reporting parallel group randomised trials

Eldridge SM, Chan CL, Campbell MJ, Bond CM, Hopewell S, Thabane L, et al. CONSORT 2010 statement: extension to randomised pilot and feasibility trials. BMJ. 2016;355.

|  |  | Reporting Item | Page Number |
| --- | --- | --- | --- |
| **Title and Abstract** |  |  |  |
| Title | #1a | Identification as a randomized trial in the title. | 1 |
| Abstract | #1b | Structured summary of trial design, methods, results, and conclusions | 3 |
| **Introduction** |  |  |  |
| Background and objectives | #2a | Scientific background and explanation of rationale | 4 |
| Background and objectives | #2b | Specific objectives or hypothesis | 5 |
| **Methods** |  |  |  |
| Trial design | #3a | Description of trial design (such as parallel, factorial) including allocation ratio. | 5 |
| Trial design | #3b | Important changes to methods after trial commencement (such as eligibility criteria), with reasons | Not applicable (there were no changes) |
| Participants | #4a | Eligibility criteria for participants | 5-6 |
| Participants | #4b | Settings and locations where the data were collected | 5, 6 |
| Interventions | #5 | The experimental and control interventions for each group with sufficient details to allow replication, including how and when they were actually administered | 6-7 |
| Outcomes | #6a | Completely defined prespecified primary and secondary outcome measures, including how and when they were assessed | 8-9 |
| Outcomes | #6b | Any changes to trial outcomes after the trial commenced, with reasons | Not applicable (there were no changes) |
| Sample size | #7a | How sample size was determined. | 9 |
| Sample size | #7b | When applicable, explanation of any interim analyses and stopping guidelines | Not applicable |
| Randomization - Sequence generation | #8a | Method used to generate the random allocation sequence. | 7-8 |
| Randomization - Sequence generation | #8b | Type of randomization; details of any restriction (such as blocking and block size) | 7 |
| Randomization - Allocation concealment mechanism | #9 | Mechanism used to implement the random allocation sequence (such as sequentially numbered containers), describing any steps taken to conceal the sequence until interventions were assigned | 7-8 |
| Randomization - Implementation | #10 | Who generated the allocation sequence, who enrolled participants, and who assigned participants to interventions | 7-8 |
| Blinding | #11a | If done, who was blinded after assignment to interventions (for example, participants, care providers, those assessing outcomes) and how. | 8 |
| Blinding | #11b | If relevant, description of the similarity of interventions | Not applicable |
| Statistical methods | #12a | Statistical methods used to compare groups for primary and secondary outcomes | 10 |
| Statistical methods | #12b | Methods for additional analyses, such as subgroup analyses and adjusted analyses | 11 |
| **Results** |  |  |  |
| Participant flow diagram (strongly recommended) | #13a | For each group, the numbers of participants who were randomly assigned, received intended treatment, and were analysed for the primary outcome | 12 |
| Participant flow | #13b | For each group, losses and exclusions after randomization, together with reason | 11-12 |
| Recruitment | #14a | Dates defining the periods of recruitment and follow-up | 6 |
| Recruitment | #14b | Why the trial ended or was stopped |  |
| Baseline data | #15 | A table showing baseline demographic and clinical characteristics for each group | 10, 13-14 |
| Numbers analysed | #16 | For each group, number of participants (denominator) included in each analysis and whether the analysis was by original assigned groups | 10 |
| Outcomes and estimation | #17a | For each primary and secondary outcome, results for each group, and the estimated effect size and its precision (such as 95% confidence interval) | 12-17 |
| Outcomes and estimation | #17b | For binary outcomes, presentation of both absolute and relative effect sizes is recommended | Not applicable |
| Ancillary analyses | #18 | Results of any other analyses performed, including subgroup analyses and adjusted analyses, distinguishing pre-specified from exploratory | 17-18 |
| Harms | #19 | All important harms or unintended effects in each group (For specific guidance see CONSORT for harms) | Not applicable (there were no harms or risks due to the nature of the intervention – mobile cognitive training that was provided via smartphone) |
| **Discussion** |  |  |  |
| Limitations | #20 | Trial limitations, addressing sources of potential bias, imprecision, and, if relevant, multiplicity of analyses | 19 |
| Generalisability | #21 | Generalisability (external validity, applicability) of the trial findings | 18-20 |
| Interpretation | #22 | Interpretation consistent with results, balancing benefits and harms, and considering other relevant evidence | 18-20 |
| Registration | #23 | Registration number and name of trial registry | 3, 5 |
| **Other information** |  |  |  |
| Protocol | #24 | Where the full trial protocol can be accessed, if available | Not applicable (the full trial protocol will be published soon) |
| Funding | #25 | Sources of funding and other support (such as supply of drugs), role of funders | 20 |
|  | #26 | Ethical approval or approval by research review committee, confirmed with reference number | 5 |
